# Supplementary material for: Plasma Lipidomic and Metabolomic Profiling after Birth in Neonates Born to SARS-CoV-19 Infected and Non-Infected Mothers at Delivery: Preliminary Results
Source: MDPI journal article supplement (doi:10.3390/metabo11120830), 2021-11-30
Supplement: s1 [file s1]

# Plasma lipidomic and metabolomic profiling after birth in neonates born to sars-cov-19 infected and non-infected mothers at delivery: preliminary results

Aggeliki Kontou<sup>1†</sup>, Christina Virgiliou<sup>2,4†</sup>, Thomai Mouskeftara<sup>3,4</sup>, Olga Begou<sup>2,4</sup>, Thomas Meikopoulos<sup>2,4</sup>, Agathi Thomaidou<sup>1</sup>, Eleni Agakidou<sup>1</sup>, Helen Gika<sup>3,4</sup>, Georgios Theodoridis<sup>2,4</sup>, Kosmas Sarafidis<sup>1</sup>

<sup>1</sup> 1<sup>st</sup> Department of Neonatology and Neonatal Intensive Care Unit, School of Medicine, Aristotle University of Thessaloniki, Ippokrateion General Hospital, Thessaloniki, Greece; angiekon2001@yahoo.gr; agathithom@yahoo.com; kosmas.sarafidis@gmail.com

<sup>2</sup> Laboratory of Analytical Chemistry, Department of Chemistry, Aristotle University of Thessaloniki, Greece; cr\_virgi@hotmail.com; mpegolga@chem.auth.gr; thomas\_meik@hotmail.com; gtheodor@chem.auth.gr

<sup>3</sup> Laboratory of Forensic Medicine and Toxicology, School of Medicine, Aristotle University of Thessaloniki, Greece; mouskeftara32@gmail.com; gkikae@auth.gr

<sup>4</sup> Center for Interdisciplinary Research and Innovation (CIRI-AUTH), Thessaloniki, Greece GR 57001, Greece

† Authors with equal contribution

\* Correspondence: K.S.: kosmas.sarafidis@gmail.com

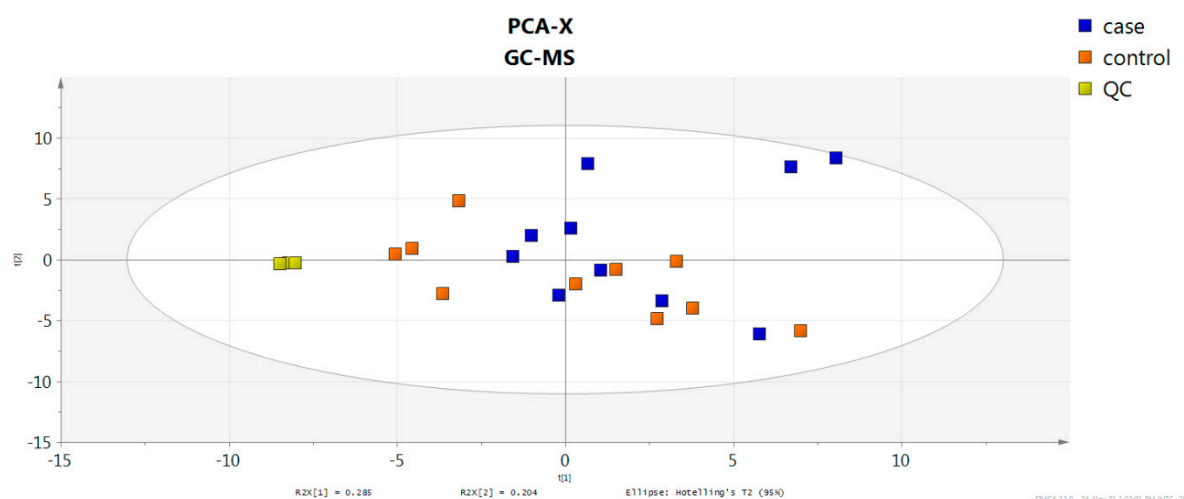

Figure S1: PCA score plot showing the examined groups together with QC samples based on the GC-MS analysis data. QC samples are clustering together, showing system's stability.

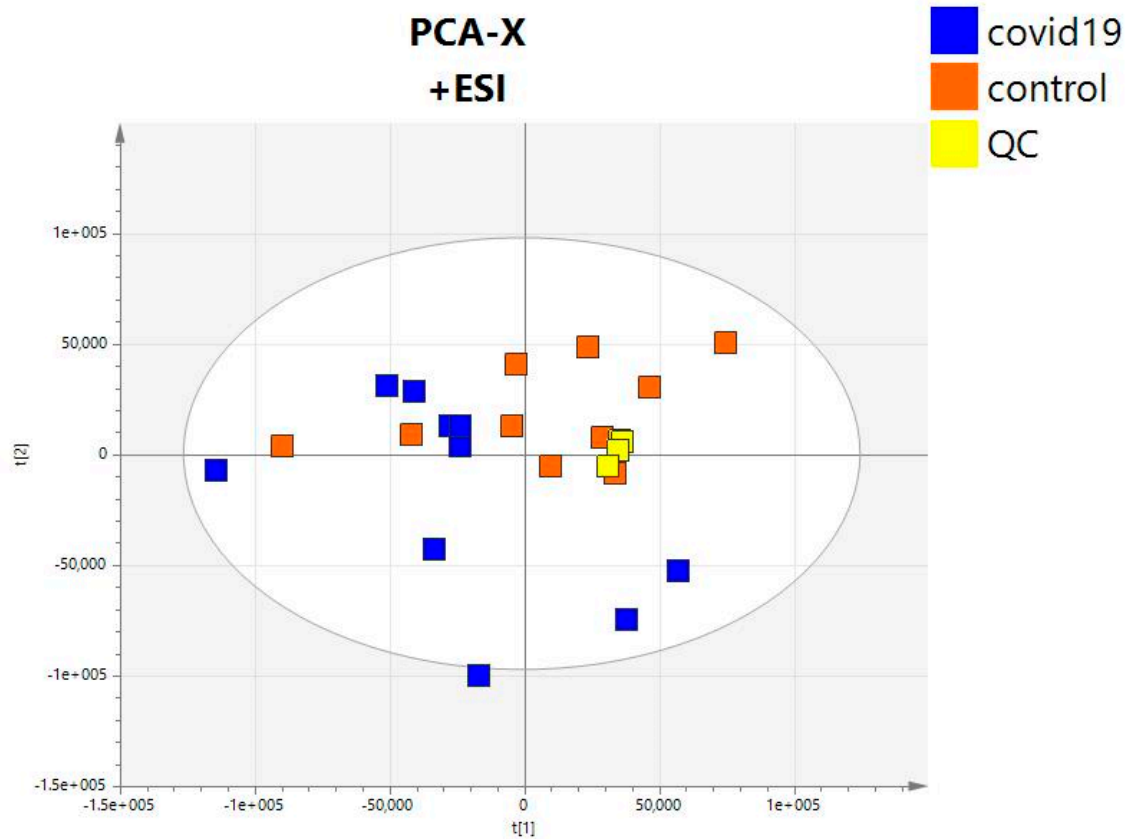

Figure S2: Indicative PCA score plot showing the examined groups together with QC samples based on the UHPLC-TOF/MS (+ESI) lipidomic profile of the plasma samples. QC samples are clustering together, showing system's stability.
